# Supplementary material for: Modulation of Pineal Melatonin Synthesis by Glutamate Involves Paracrine Interactions between Pinealocytes and Astrocytes through NF-κB Activation
Source: Hindawi journal article supplement (doi:10.1155/2013/618432), 2013-01-01
Supplement: f1 [file 618432.f1.pdf]

## Supplemental Table 1

Supplemental Table 1. Sequence of specific primers for rat glutamate receptors used in RT-PCR assays.

| Primers/GenBank No    | Size (bp) | Forward                        | Reverse                        |
|-----------------------|-----------|--------------------------------|--------------------------------|
| GluR1/NM_031608.1     | 203       | 5'-TTCTAGGTGCGGTTGTGGGTG-3'    | 5'-GGAGAACTGGGAACAGAATCGG-3'   |
| GluR2/NM_017261.2     | 155       | 5'-ATTGTACTACTACGATGATTC-3'    | 5'-CGGTGCACAGCATCGTCGGA-3'     |
| GluR3/NM_032990.2     | 193       | 5'-TCTGCTCCCAGTTCTCCAGAGG-3'   | 5'-CCCAGAAGACTCAGAATGGCAC-3'   |
| NR1/NM_017010.1       | 201       | 5'TACTACTGCCAACTTCCGAGCTTTC-3' | 5'-GCACAGTAACCAGGTTACTAGGGA-3' |
| mGluR1/NM_017011.1    | 79        | 5'-CCAACGGAGGGATCACAATAA-3'    | 5'-TCCAGCCTCAGCTTCAGGAA-3'     |
| mGluR2/NM_001105711.1 | 198       | 5'-TGGCACAGGCAAGGAGACA-3'      | 5'-CGGTGGTTACAGCGCAATG-3'      |
| mGluR3/NM_001105712.1 | 196       | 5'-TGCTCTGAGGGTGAATATGG-3'     | 5'-ATGTTACGCAGCCGTGCTT-3'      |
| mGluR5/NM_017012.1    | 165       | 5'-TTGTGGCAGCGACTGTCTGT-3'     | 5'-TCTTGGGAAAGGGTTTGATGA-3'    |
| mGluR7/NM_031040.1    | 70        | 5'-CAGAAACGGAAGCGAAGCTT-3'     | 5'-GTTTGTGTGACAGCCTTGATGAC-3'  |

## Supplemental Figure 1

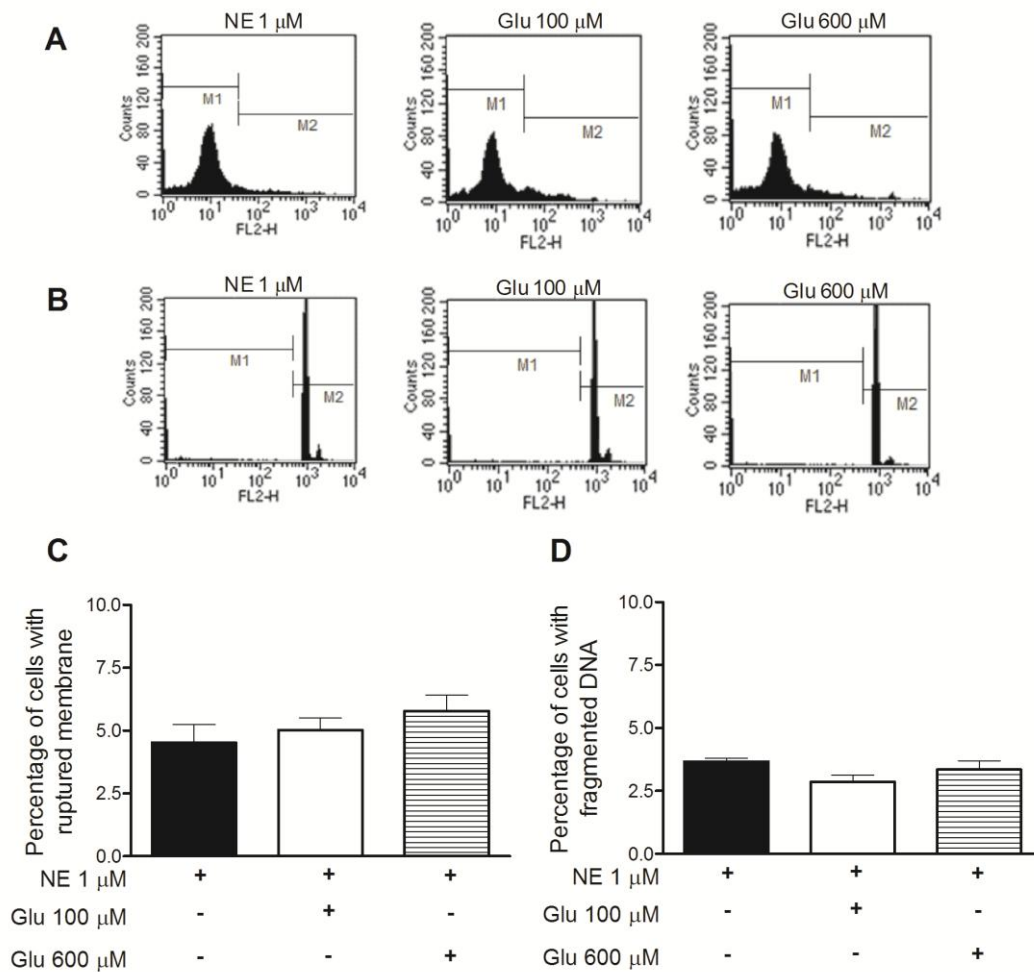

**Supplemental Figure 1. Flow cytometric analysis of cell membrane integrity and DNA fragmentation.** Pineal gland cells were treated with norepinephrine in the absence (NE) or presence of glutamate (Glu). Histograms show the intensity in the FL-2 channel, which corresponds to the propidium iodide emission wavelength. (A) Representative histograms of the membrane integrity analysis. (B) Representative histograms of the DNA fragmentation analysis. Percentage of rat pineal gland cells with ruptured membrane (C) and DNA fragmentation (D) after treatment with NE 1  $\mu\text{M}$  and Glu 100 or 600  $\mu\text{M}$  for 5 h. The values are presented as the mean  $\pm$  SEM from three experiments.
